1 **Evaluation of diversity levels of the integrase gene sequences coming from HIV-1**  
2 **virus, supporting the lack of target specificity of ivermectin *versus* the integrase-**  
3 **importin complex in SARS-CoV-2 infection**

4

5 Pierre Teodósio Félix\*

6

7 Laboratory of Population Genetics and Computational Evolutionary Biology - [LaBECOM](#), UNIVISA,

8

Vitória de Santo Antão, Pernambuco, Brazil.

9

\*Corresponding author/ **Contact:** pierrefelix@univisa.edu.br

10

11 **Keywords:** HIV-1, Integrase, SARS-CoV-2, Phylogeny; AMOVA

12

13 **Abstract**

14 Therapies with new drugs have been appearing in tests worldwide as potential inhibitors  
15 of sars-cov-2 virus replication. Recently, one of these drugs, Ivermectin, was reported as  
16 an inhibitor of the nuclear import of HIV-1 proteins *in vitro*, soon becoming the target of  
17 an international prospecting work (not yet published), with patients tested for COVID-  
18 19. However, understanding the evolutionary aspects of the biological components  
19 involved in the complex drug-nuclear import helps in understanding how these  
20 relationships exist in the deactivation of viral infections. Thus, 153 sequences of the HIV-  
21 1 integrase gene were analyzed for their genetic structure and molecular diversity and the  
22 presence of two distinct groups for the Gene and not only one, was detected; As well as  
23 different degrees of structuring for each of these groups. These results support the  
24 interpretation of the lack of conservation of the HIV-1 gene and that the number of  
25 existing polymorphisms, only for this structure of the complex, implies the non-efficiency  
26 of a drug at population levels. Thus, the molecular diversity found in HIV-1 can be  
27 extrapolated to other viruses, such as Including, SARS-CoV-2 and the functionality of  
28 the drug, interacting with the integrase-importin complex, can be further decreased.

29

30 **1. Introduction**

31 As a flattening measure of the growth curve of the number of cases of COVID-19  
32 in Brazil, the recommendations of the Ministry of Health continue to be limited to the  
33 monitoring and containment of the virus as well as to those of maintaining social  
34 distancing, the use of face protection masks and constant hand washing. These  
35 recommendations, which follow the recommendations of all the world's health agencies,

36 seem to be the most effective to inhibit the outbreak of this pandemic, which, as a direct  
37 consequence of non-control, would result in the breakdown of our health system  
38 (MINISTÉRIO DA SAÚDE, 2020).

39 However, a number of therapies are in tests worldwide and these range from  
40 vaccines to the use of some drugs (WHO, 2020). With regard to the new drugs tested to  
41 combat COVID-19, a not-so-new one (for other treatments) called IVERMECTIN,  
42 figured as an alternative for its power to inhibit the replication of the SARS-CoV-2 virus  
43 *in vitro*. Ivermectin, a pre-tested food and drug administration (FDA) for antiparasitic use,  
44 demonstrated broad-spectrum antiviral activity *in vitro* for the SARS-CoV-2 virus, and  
45 even two hours after infection was able to reduce the amount of viral RNA by  
46 approximately 5,000 times after 48 hours. This made ivermectin a candidate for in-depth  
47 investigations for possible human benefits (CALY, L. *et al.*, 2020).

48 Even thinking about the "*in vitro*" characteristics of the study with ivermectin, its  
49 usefulness and potentiality as therapy did not reach exhaustion. Contrary to some drugs  
50 such as Chloroquine and hydroxichloroquine, discarded by who and many health agencies  
51 and research centers around the world, it ended up becoming a target in an international,  
52 multicenter and observational prospecting work, controlled on a case-by-case basis, using  
53 data collected from patients diagnosed with COVID-19 between January 1 and March 31,  
54 2020. These patients were exposed to doses of Ivermectin compared to patients with  
55 COVID-19 who received medical treatment without ivermectin. In this study (*in vivo*)  
56 and not yet published, the researchers assume that, in addition to being safe for use, the  
57 administration of ivermectin in patients hospitalized with COVID-19 was directly  
58 associated with the fact that a lower mortality and a shorter length of hospital stay, making  
59 the difference in the survival of hospitalized patients (PATEL A.N. *et al.*, 2020).

60 The question then became the understanding of how ivermectin acted in the  
61 inhibition of the SARS-CoV-2 virus, since as an antiparasitic agent the issue of its  
62 antiviral activity was still unknown. In some studies (BOLDESCU *et al.*, 2017; CALY *et al.*,  
63 2020; FRIEMAN *et al.*, 2007; CAO *et al.*, 2020; GREIN *et al.*, 2020; FERNER *et al.*,  
64 2020; CRUMP *et al.*, 2017), ivermectin had been reported as an inhibitor of the nuclear  
65 import of viral proteins, as the non-structural protein of the tumor antigen of the ape virus  
66 SV40 (an old known molecular biology as cloning vector in ancient techniques of  
67 recombinant DNA technology), and also acting in the limitation of infections of other  
68 RNA viruses such as viruses of types 1 to 4 of dengue, West Nile, Venezuelan equine  
69 encephalitis and influenza. Until, in studies with the HIV-1 virus (human

70 immunodeficiency virus type 1), it was finally associated with the breakdown of the  
71 interaction between the ENZYME INTEGRASE of the HIV-1 virus and the heterodimer  
72  $\alpha / \beta 1$  of IMPORTIN, which is the protein responsible for the nuclear import of the  
73 INTEGRASE itself.

74 Since the decade of 1990, the role of integrase as an inhibitor of HIV replication  
75 has been suggested by scientists as a promising opportunity in the treatment of viral  
76 infections because it is a highly conserved enzyme from an evolutionary point of view  
77 and therefore with less genetic variability (SPRINZ, E. 2016). Because it is very  
78 conserved, it has greater difficulty in selecting mutations associated with resistance,  
79 besides presenting potential synergism with other RNA viruses, including those viruses  
80 that had resistance to reverse transcriptase inhibitors. (PURAS L. et al, 1995);  
81 (ROBINSON, W.E., 1998) (BEALE K.K., ROBINSON W.E. JR. 2000); (REINKE R,  
82 STEFFEN N.R., ROBINSON W.E. JR. 2001)

83 Although it has been tested in humans for three decades (SMART, T. 1996), its  
84 development has been quite "truncated" by the high cost of production and its  
85 pharmacokinetic limitations (such as low selectivity due to integrase, difficulties  
86 encountered in its injectable use and short half-life time) preventing its clinical use  
87 (SPRINZ, E. 2016). However, understanding the evolutionary aspects of this enzyme can  
88 help the scientific community understand what possible relationships exist between it and  
89 the drugs that interact in its connection with IMPORTIN, especially in the role of  
90 destabilization of the import complex that disables viral infections, such as ivermectin.  
91 Thinking like this, the team of the Laboratory of Population Genetics and Computational  
92 Evolutionary Biology ([LaBECOM-UNIVISA](#)) designed a study of phylogeny and  
93 molecular variance analysis to evaluate the possible levels of genetic diversity and  
94 polymorphisms existing in a PopSet of the integrase gene of human immunodeficiency  
95 virus 1 collected in a Russian population of Kyrgyzstan and available at GENBANK.

96

## 97 **2. Objective**

98 Evaluate the possible levels of genetic diversity and polymorphisms existing in 153  
99 sequences of the integrase gene of human immunodeficiency virus 1 in the Kyrgyzstan  
100 population.

101

102

103

### 104 3. Methodology

105 **3.1. Databank:** The 153 gene sequences of the integrase gene of human  
106 immunodeficiency virus 1 were collected from GENBANK  
107 (<https://www.ncbi.nlm.nih.gov/popset/?term=MN888087.1> and participate in a PopSet  
108 dipped by Totmenin and collaborators on March 25, 2020 (Popset:1822236350).

109 **3.2. Phylogenetics Analyses:** For phylogenetic analyses, the previously described  
110 nucleotide sequences were used. The sequences were aligned using the MEGA X program  
111 (TAMURA et al., 2018) and gaps were extracted for the construction of phylogenetic  
112 trees.

113 **3.3. Genetic Structuring Analyses:** Paired FST estimators were obtained with the  
114 software Arlequin v. 3.5 (EXCOFFIER et al., 2005) using 1000 random permutations.  
115 The FST matrix generated by the software was used in the construction of a dendrogram  
116 based on the UPGMA distance method with the MEGA X software (TAMURA et al.,  
117 2018) and the FST and geographic distance matrices were not compared.

118

### 119 4. Results

#### 120 4.1. General properties of integrase gene sequences of the HIV-1 human virus

121 Of the 153 sequences of the gene segment of the integrase gene of human  
122 immunodeficiency virus 1 with 882 bp of extension, the analyses revealed the presence  
123 of 343 polymorphic sites and of these, 70 sites were parsimoniously informative. The  
124 graphical representation of these sites could be seen in a logo built with the WEBLOGO  
125 3 program (CROOKS et al., 2004), where the size of each nucleotide is proportional to  
126 its frequency for certain sites. (Figure 1).

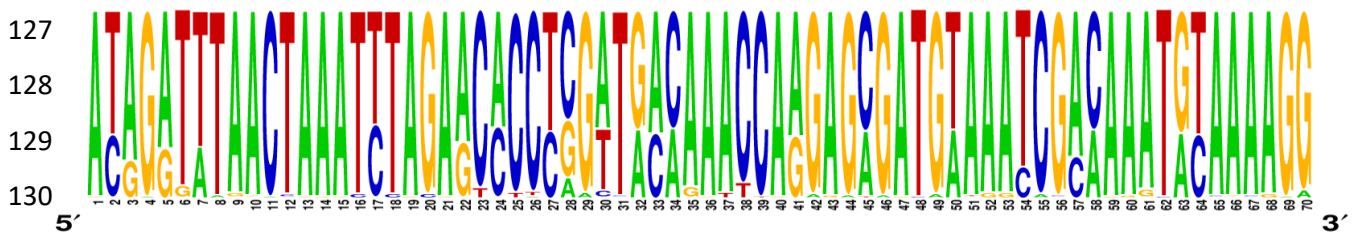

131 **Figure 1:** Graphic representation of 70 parsimoniously-informative sites of the integrase gene of human  
132 immunodeficiency virus 1.

133 Using the UPGMA method, based on the 70 parsimony-informative sites, it was  
134 possible to understand that the 153 haplotypes comprised two distinct groups, here  
135 called Bishkek and Osh, in reference to their collection origin and no haplotype sharing  
136 was observed between the two groups (Figure 2).

137  
138  
139  
140  
141  
142  
143  
144  
145  
146  
147  
148  
149  
150  
151  
152  
153  
154

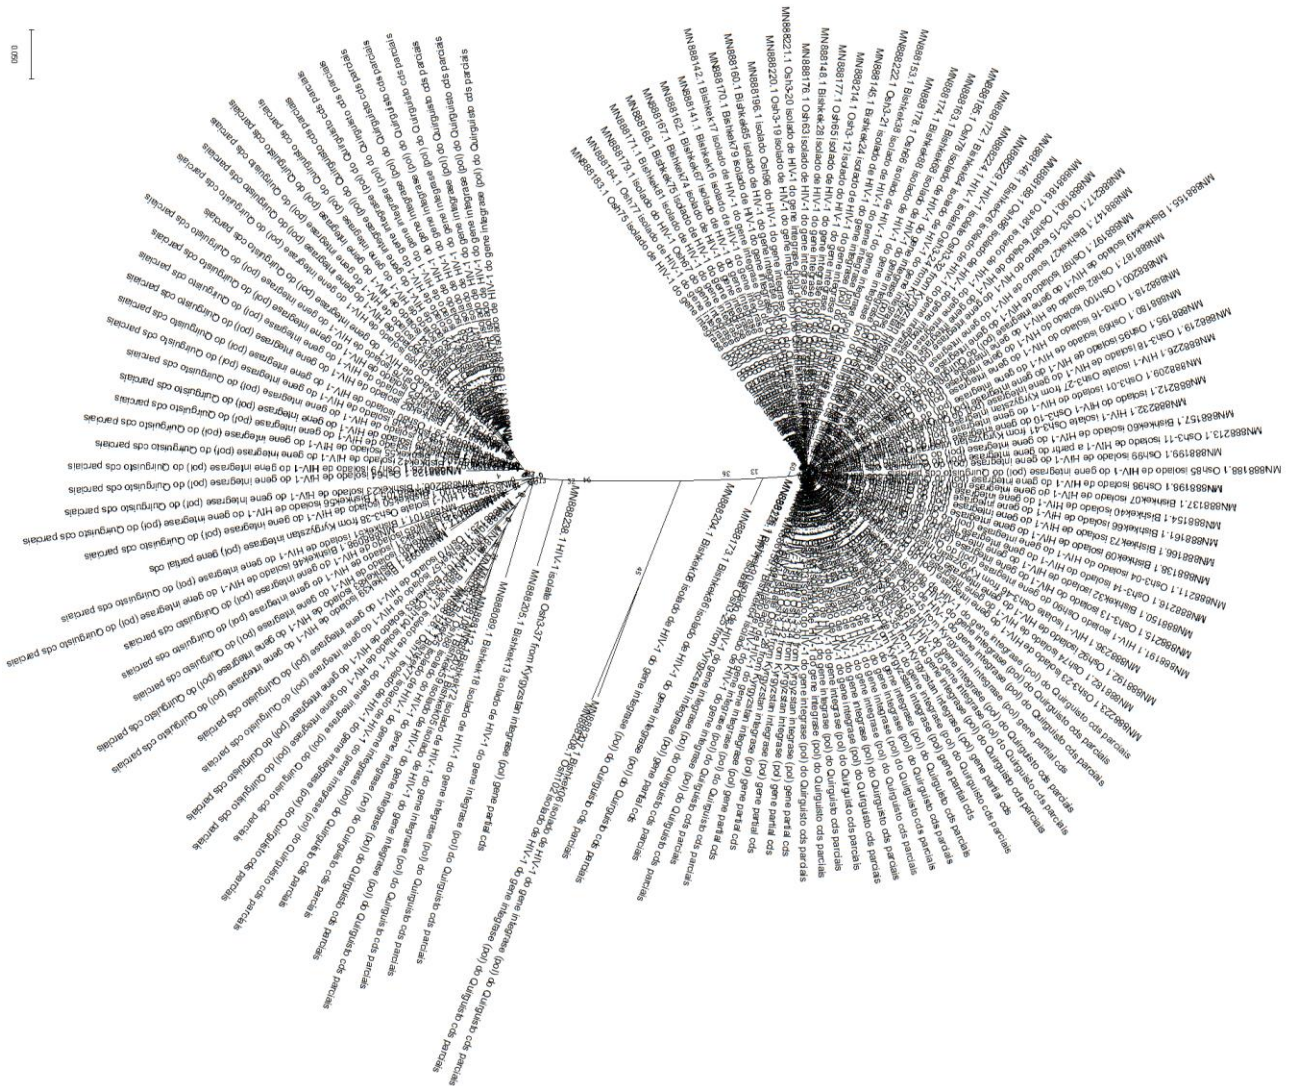

155 **Figure 2.** Evolutionary analysis by the maximum likelihood method. The evolutionary history was inferred  
156 using the Maximum Likelihood method and the Tamura 3-parameter model [1]. The tree with the highest  
157 probability of logging (-1366.35) is shown. The percentage of trees in which the associated taxa group is  
158 shown next to the branches. The initial trees for heuristic search were obtained automatically by applying  
159 the Join-Join and BioNJ algorithms to an array of distances in estimated pairs using the Tamura 3 parameter  
160 model, and then selecting the topology with a higher log probability value. This analysis involved 153  
161 nucleotide sequences. There was a total of 70 positions in the final dataset. Evolutionary analyses were  
162 performed on MEGA X.

163

## 164 **4.2. Genetic Distance Analysis**

165 Analyses based on  $F_{ST}$  values also confirmed the presence of two distinct genetic  
166 entities, with a component of variation greater than 36% and with p value lower than 0.05  
167 with significant evolutionary divergences within the groups (table 1) and also evidenced  
168 a high genetic similarity between the sequences that comprised the Oshi group, as well as  
169 a greater evolutionary divergence between the sequences that comprised the Bishkek  
170 group (table 2); (table 3).

**Table 1.** Paired FST values for the 153 sequences of the integrase gene of human immunodeficiency virus 1 with 882 bp extension.

| <b>Populations</b> | Bishkek        | Osh            |
|--------------------|----------------|----------------|
| Bishkek            | 0.00000        | <b>0.36597</b> |
| Osh                | <b>0.36597</b> | 0.00000        |

171

**Table 2.** Estimates of the mean evolutionary divergence within the groups. Number of base substitutions per location, the average of all sequence pairs within each group.

| <b>Groups</b> | <b>Estimate average</b> | <b>Standard error</b> |
|---------------|-------------------------|-----------------------|
| Bishkek       | 0,23                    | 0,05                  |
| Osh           | 0,09                    | 0,01                  |

Standard error estimates are shown above the diagonal. The analyses were performed using the maximum composite likelihood model [1]. This analysis involved 153 nucleotide sequences. All ambiguous positions have been removed for each sequence pair (pair exclusion option). There was a total of 70 positions in the final dataset. Evolutionary analyses were performed on MEGA X.

172

**Table 3.** Estimates of evolutionary divergence between groups.

| <b>Groups</b> | Bishkek     | Osh         |
|---------------|-------------|-------------|
| Bishkek       | -           | <b>0,27</b> |
| Osh           | <b>0,27</b> | -           |

The number of base overrides per location of the average of all pairs of sequences between groups is shown. The analyses were performed using the maximum composite likelihood model [1]. This analysis involved 153 nucleotide sequences. All ambiguous positions have been removed for each sequence pair (pair exclusion option). There was a total of 70 positions in the final dataset. Evolutionary analyses were performed on MEGA X.

173

#### 174 **4.3. Molecular Variance Analysis (AMOVA)**

175 Molecular variation analyses of the 153 sequences of the integrase gene of human  
 176 immunodeficiency virus 1 revealed very significant FST values (FST = 0.36) when  
 177 analyzed as distinct and even more significant groups when their internal differences were  
 178 analyzed (in both groups) (Table 4).

**Table 4:** Molecular Variance Analysis, applying Wright's FST (1969), for the 153 sequences of the integrase gene of human immunodeficiency virus 1 with 882 bp extension

| <b>Variation source</b>      | <b>Degrees of freedom.</b> | <b>Sum of squares</b> | <b>Variation components</b> | <b>Percentage of variation.</b> |
|------------------------------|----------------------------|-----------------------|-----------------------------|---------------------------------|
| <b>Among the populations</b> | 1                          | 207.72                | 2.65 Va                     | 36.6%                           |
| <b>Within populations</b>    | 151                        | 694.62                | 4.60 Vb                     | 63.4%                           |
| <b>TOTAL</b>                 | 152                        | 902.34                | 7.25                        |                                 |

F<sub>ST</sub> = 0,3659 \*p < 0,05/ Significance tests (1023 permutations). AMOVA design and results: Weir, B.S. and Cockerham, C.C. 1984. Excoffier, L., Smouse, P., and Quattro, J. 1992. Weir, B. S., 1996.

179

180 Tau variations (related to the ancestry of the two groups) revealed a significant  
181 time of divergence, supported by mismatch analysis of the observed distribution ( $\tau =$   
182 44%) and with constant mutation rates between localities (table 5).

**Table 5.** Tau ( $\tau$ ) values for the 153 sequences of the integrase gene of human immunodeficiency virus 1 with 882 bp extension

| <b>Populations</b> | Bishkek        | Osh            |
|--------------------|----------------|----------------|
| Bishkek            | 0.00000        | <b>1.72033</b> |
| Osh                | <b>1.72033</b> | 0.00000        |

183

#### 184 **4.4. Molecular diversity analyses**

185 Molecular diversity analyses estimated by  $\theta$  reflected a significant level of  
186 mutations among all haplotypes (transitions and transversions). Indel mutations  
187 (insertions or deletions) were not found in either of the two groups studied. The D tests  
188 of Tajima and Fs de Fu showed disagreements between the estimates of general  $\theta$  and  $\pi$ ,  
189 but with negative and highly significant values, indicating an absence of population  
190 expansion. The irregularity index (R= Raggedness) with parametric bootstrap simulated  
191 new values  $\theta$  for before and after a supposed demographic expansion and in this case  
192 assumed a value equal to zero for the groups (Table 6); (Table 7).

**Table 6.** Molecular Diversity Indexes for the 153 sequences of the integrase gene of human immunodeficiency virus 1 with 882 bp extension

| <b>Indexes</b>    | Bishkek | Osh |
|-------------------|---------|-----|
| Transitions       | 22      | 17  |
| Transversions     | 12      | 03  |
| Replacements      | 34      | 20  |
| Indels            | 0       | 0   |
| $\pi$             | 8.6     | 6.1 |
| $\theta_S$        | 8.1     | 5.4 |
| $\theta_S$ (d.p)  | 2.7     | 2.0 |
| $\theta\pi$       | 8.6     | 6.1 |
| $\theta\pi$ (d.p) | 4.5     | 3.3 |

193

194

**Table 7.** Neutrality tests for the 153 sequences of a segment of the integrase gene of human immunodeficiency virus 1 with 882 bp extension

| Test                       | Bishkek          | Osh              | Average  | D.P.    |
|----------------------------|------------------|------------------|----------|---------|
| <b>Ewens-Watterson</b>     |                  |                  |          |         |
| Number of Alleles          | 76               | 77               | 76.50000 | 0.70711 |
| <b>Chakraborty's</b>       |                  |                  |          |         |
| Expected Number of Alleles | 24.96770         | 16.04377         | 20.50573 | 6.31017 |
| <b>Tajima Test</b>         |                  |                  |          |         |
| Sample Size                | 76               | 77               | 76.50000 | 0.70711 |
| S                          | 65               | 61               | 63.00000 | 2.82843 |
| $\pi$                      | 12.56035         | 5.88448          | 9.22242  | 4.72055 |
| D de Tajima                | <b>-0.17584</b>  | <b>-1.74039</b>  | 0.95812  | 1.10631 |
| D de Tajima (p-value)      | 0.48800          | 0.01400          | 0.25100  | 0.33517 |
| <b>FU'S and FS Test</b>    |                  |                  |          |         |
| Number of Alleles          | 76               | 77               | 76.50000 | 0.70711 |
| $\theta\pi$                | 12.56035         | 5.88448          | 9.22242  | 4.72055 |
| Expected number of alleles | 24.96770         | 16.04377         | 20.50573 | 6.31017 |
| FS                         | <b>-24.32473</b> | <b>-25.26472</b> | 24.79472 | 0.66468 |
| FS (p-value)               | 0.00000          | 0.00000          | 0.00000  | 0.00000 |

195

## 196 5. Discussion

197 As the use of phylogenetic analysis and population structure methodologies had  
 198 not yet been used in this PopSet, in this study it was possible to detect the existence of  
 199 these two distinct groups for the integrase gene of human immunodeficiency virus 1 in  
 200 the Kyrgyz region. The groups described here seem to correspond to two HIV-1  
 201 subpopulations that co-exist in the same locality and that had their genetic distances  
 202 supported by FST analyses using the marker in question and its structure sufficiently  
 203 significant for such interpretation. Different degrees of structuring were detected for each  
 204 group, being essentially smaller among one of them (Bishkek). These data suggest that  
 205 the high degree of structuring present in Oshi may be related to a loss of intermediate  
 206 haplotypes over the generations, possibly associated with an absence of gene flow.

207 These levels of structuring were also supported by simple phylogenetic pairing  
 208 methodologies such as UPGMA, which in this case, with a discontinuous pattern of



209 genetic divergence between the groups (supporting the occurrence of geographic  
210 undercalculations resulting from past fragmentation events), was observed a large number  
211 of branches with many mutational steps. These mutations possibly settled by drift due to  
212 the founding effect, which accompanies the dispersal behavior and/or loss of intermediate  
213 haplotypes over the generations. The values found for genetic distance support the  
214 presence of this discontinuous pattern of divergence between the studied groups, since  
215 they considered important the minimum differences between the groups, when the  
216 haplotypes between them were exchanged, as well as the inference of values greater than  
217 or equal to that observed in the proportion of these permutations, including the p value of  
218 the test.

219 The discrimination of the two genetic entities in the same locality was also  
220 perceived when the inter-haplotypic variations were hierarchized in all covariance  
221 components: by their intra and interindividual differences or by their intra- and intergroup  
222 differences, generating dendrograms that supported the idea that the significant  
223 differences found in the Bishkek group, for example, can even be shared in their form,  
224 but not in their number, since the result of estimates of the mean evolutionary divergence  
225 within the Oshi group were so low.

226 Since no relationship between genetic distance and geographic distance was made  
227 in this study, the lack of gene flow (observed by non-haplotypic sharing) should be  
228 supported by the presence of geographic barriers. The estimators  $\theta$ , although being  
229 extremely sensitive to any form of molecular variation (Fu, 1997), supported the  
230 uniformity between the results found by all the methodologies employed, and can be  
231 interpreted as a phylogenetic confirmation that there is no consensus in the conservation  
232 of the gene of human immunodeficiency virus integrase 1 in samples from the same  
233 geographical region, being therefore safe to state that the large number of polymorphisms  
234 existing, should be reflected, including, in its protein product (integrase enzyme). This  
235 consideration provides certainty that an efficient response of drugs that destabilize the  
236 integrase-importin link such as ivermectin should not be expected for all HIV1 viruses  
237 from humans, whether they come from the same geographic region (as this study shows),  
238 or even more from samples from geographically distinct regions and thus, by  
239 extrapolating the levels of polymorphism and molecular diversity found in the samples  
240 of this study, for other RNA viruses, such as Sars-Cov-2, the integrase-importin  
241 relationship may be even more diverse, and may bring less and less functionality to drugs

242 that interact with it in the role of destabilizing the integrase-importin complex, which in  
243 turn inhibit or reduce the infectious potential of any RNA virus.

244

## 245 **6. References**

246 Beale K.K., Robinson WE Jr. **Combinations of reverse transcriptase, protease, and**  
247 **integrase inhibitors can be synergistic in vitro against drug-sensitive and RT**  
248 **inhibitor-resistant molecular clones of HIV-1.** Antiviral Res. 2000; 46:223-32.

249

250 Boldescu V, Behnam MAM, Vasilakis N, Klein CD. **Broad-spectrum agents for**  
251 **flaviviral infections: dengue, Zika and beyond.** Nat Rev Drug Discov. 2017; 16:565-  
252 586.

253

254 BRASIL. Ministério da Saúde. **COVID-19 NO BRASIL.** Dados do setor. Brasília, 2020.  
255 Disponível em: [https://susanalitico.saude.gov.br/extensions/covid-19\\_html/covid-](https://susanalitico.saude.gov.br/extensions/covid-19_html/covid-19_html.html)  
256 [19\\_html.html](https://susanalitico.saude.gov.br/extensions/covid-19_html/covid-19_html.html). Acesso em: 10/07/2020.

257

258 Caly, L; Julian D. Druce, Mike G. Catton, David A. Jans, Kylie M. Wagstaff, The **FDA-**  
259 **approved drug ivermectin inhibits the replication of SARS-CoV-2 in vitro,** Antiviral  
260 Research, Volume 178, 2020, 104787, ISSN 0166-  
261 3542, <https://doi.org/10.1016/j.antiviral.2020.104787>. ([http://www.sciencedirect.com/sci-](http://www.sciencedirect.com/science/article/pii/S0166354220302011)  
262 [ence/article/pii/S0166354220302011](http://www.sciencedirect.com/science/article/pii/S0166354220302011)).

263

264 Cao B, Wang Y, Wen D, et al. **A Trial of Lopinavir-Ritonavir in Adults Hospitalized**  
265 **with Severe Covid-19.** N Engl J Med. 2020 Mar 18. doi: 10.1056/NEJMoa2001282.

266

267 Crooks G.E., Hon G, Chandonia JM, Brenner SE **WebLogo: A sequence logo**  
268 **generator,** Genome Research, 14:1188-1190, (2004).

269

270 Crump A. **Ivermectin: enigmatic multifaceted 'wonder' drug continues to surprise**  
271 **and exceed expectations.** J Antibiot (Tokyo). 2017 May;70(5):495-505.

272

273 Eduardo S. **Uso de inibidores da integrase como agentes de primeira linha no**  
274 **tratamento da infecção pelo HIV.** BJID. Educação Médica Continuada. Vol 2 • Nº 4 •

275 Agosto 2016. Disponível em: [https://www.elsevier.es/pt-revista-the-brazilian-journal-](https://www.elsevier.es/pt-revista-the-brazilian-journal-infectious-diseases-269-articulo-uso-inibidores-da-integrase-como-X2177511716574464)  
276 [infectious-diseases-269-articulo-uso-inibidores-da-integrase-como-](https://www.elsevier.es/pt-revista-the-brazilian-journal-infectious-diseases-269-articulo-uso-inibidores-da-integrase-como-X2177511716574464)  
277 [X2177511716574464](https://www.elsevier.es/pt-revista-the-brazilian-journal-infectious-diseases-269-articulo-uso-inibidores-da-integrase-como-X2177511716574464). Acesso em: 06 de julho de 2020.  
278  
279 Ferner R.E., Aronson JK. **Chloroquine and hydroxychloroquine in covid-19**. BMJ.  
280 2020 Apr 8;369:m1432. doi: 10.1136/bmj.m1432.  
281  
282 Frieman, M., Yount, B., Heise, M., Kopecky-Bromberg, S.A., Palese, P., Baric, R.S.,  
283 **Severe acute respiratory syndrome coronavirus ORF6 antagonizes STAT1 function**  
284 **by sequestering nuclear import factors on the rough endoplasmic**  
285 **reticulum/Golginmembrane**, J Virol, 81 (18) (2007), pp. 9812-9824.  
286  
287 Grein J, Ohmagari N, Shin D, **Compassionate Use of Remdesivir for Patients with**  
288 **Severe Covid19**. N Engl J Med. 2020 Apr 10. doi:10.1056/NEJMoa2007016.  
289  
290 Kumar S, Stecher G, Li M, Knyaz C, and Tamura K. MEGA X: **Molecular Evolutionary**  
291 **Genetics Analysis across computing platforms**. (2018). Molecular Biology and  
292 Evolution 35:1547-1549.  
293  
294 Nei M. and Kumar S. (2000). **Molecular Evolution and Phylogenetics**. Oxford  
295 University Press, New York.  
296  
297 OMS. **Organização Mundial de Saúde**. Genebra: OMS, 2020.  
298  
299 Patel, A.N.; Desai, S.S.; Grainger, D.W.; Mehra, M.R. 2020. **Usefulness of Ivermectin**  
300 **in COVID-19 Illness**. Disponível em:  
301 [https://www.google.com/url?sa=t&source=web&rct=j&url=http://www.proyectodime.i](https://www.google.com/url?sa=t&source=web&rct=j&url=http://www.proyectodime.info/documents/219/Utilidad_de_la_ivermectina.pdf&ved=2ahUKEwjOjJ-SudTpAhUaCrkGHahuAxkQFjAHegQICBAB&usq=AOvVaw2dLQryr8gQxSZFATZvYSo3)  
302 [nfo/documents/219/Utilidad\\_de\\_la\\_ivermectina.pdf&ved=2ahUKEwjOjJ-](https://www.google.com/url?sa=t&source=web&rct=j&url=http://www.proyectodime.info/documents/219/Utilidad_de_la_ivermectina.pdf&ved=2ahUKEwjOjJ-SudTpAhUaCrkGHahuAxkQFjAHegQICBAB&usq=AOvVaw2dLQryr8gQxSZFATZvYSo3)  
303 [SudTpAhUaCrkGHahuAxkQFjAHegQICBAB&usq=AOvVaw2dLQryr8gQxSZFATZv](https://www.google.com/url?sa=t&source=web&rct=j&url=http://www.proyectodime.info/documents/219/Utilidad_de_la_ivermectina.pdf&ved=2ahUKEwjOjJ-SudTpAhUaCrkGHahuAxkQFjAHegQICBAB&usq=AOvVaw2dLQryr8gQxSZFATZvYSo3)  
304 [YSo3](https://www.google.com/url?sa=t&source=web&rct=j&url=http://www.proyectodime.info/documents/219/Utilidad_de_la_ivermectina.pdf&ved=2ahUKEwjOjJ-SudTpAhUaCrkGHahuAxkQFjAHegQICBAB&usq=AOvVaw2dLQryr8gQxSZFATZvYSo3). Acessado em 15/06/2020.  
305  
306 Puras Lutzke RA, Eppens NA, Weber PA, et al. **Identification of a hexapeptide**  
307 **inhibitor of the human immunodeficiency vírus integrase protein by using a**  
308 **combinatorial chemical library**. Proc Natl Acad Sci USA. 1995; 92:11456-60.

309

310 Reinke R1, Steffen NR, Robinson WE Jr. **Natural selection results in conservation of**  
311 **HIV-1 integrase activity despite sequence variability.** AIDS. 2001; 15:823-30.

312

313 Robinson WE Jr. **L-chicoric acid, an inhibitor of human immunodeficiency virus type**  
314 **1 (HIV-1) integrase, improves on the in vitro anti-HIV-1 effect of Zidovudine plus a**  
315 **protease inhibitor (AG1350).** Antiviral Res. 1998; 39:101-11.

316

317 Schneider TD, Stephens RM. 1990. Sequence Logos: **A New Way to Display Consensus**  
318 **Sequences.** Nucleic Acids Res. 18:6097-6100.

319

320 Smart T. **The first integrase inhibitor.** GMHC Treat Issues. 1996; 10:8-9.

321

322 Tamura K. (1992). **Estimation of the number of nucleotide substitutions when there**  
323 **are strong transition-transversion and G + C-content biases.** Molecular Biology and  
324 Evolution 9:678-687.
